# Supplementary material for: Kinetic analysis of microwave-enhanced cellulose dissolution in ionic solvents
Source: Royal Society of Chemistry journal article supplement (doi:10.1039/c9cp06239d), 2019-11-28
Supplement: c9cp06239d1.pdf [file c9cp06239d1.pdf]

## Kinetic analysis of microwave-enhanced cellulose dissolution in ionic solvents

Pablo B. Sánchez<sup>a</sup>, Shuntaro Tsubaki<sup>b</sup>, Agílio A. H. Pádua<sup>a</sup>, Yuji Wada<sup>b</sup>

<sup>a</sup>Laboratoire de Chimie, École Normale Supérieure de Lyon & CNRS, 46 Allée d'Italie, 69007 Lyon, France

<sup>b</sup>Department of Chemical Science and Engineering, School of Materials and Chemical Technology, Tokyo Institute of Technology, 2-12 Ookayama, Meguro, Tokyo 152-8552, Japan

### 1. Experimental information

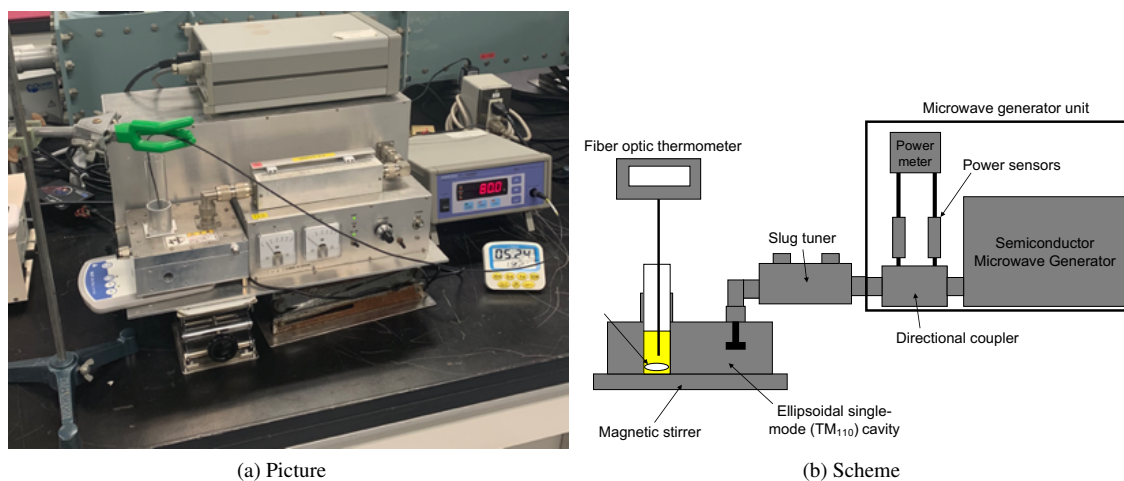

Figure S1: MW device described in the experimental section

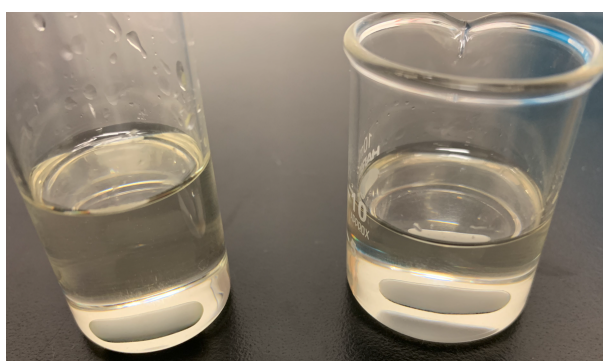

Figure S2: Vessels employed for MW (left) (diameter = 24 mm) and conventional (right) heating (diameter = 27 mm)

Email address: pablo.sanchez@ens-lyon.fr (Pablo B. Sánchez)

## 2. Complementary results

### 2.1. SEM images

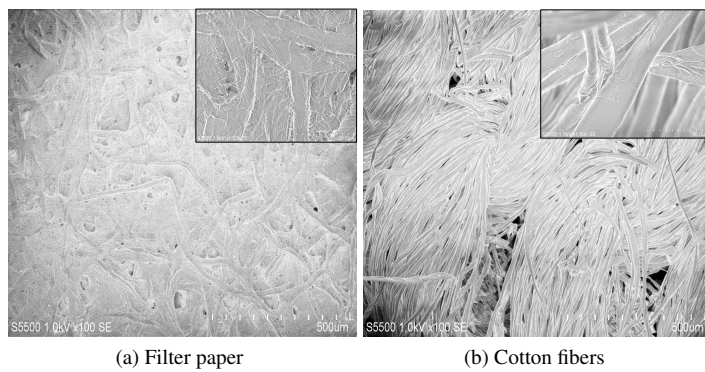

Figure S3: SEM images of the cellulose sources

### 2.2. XRD scans

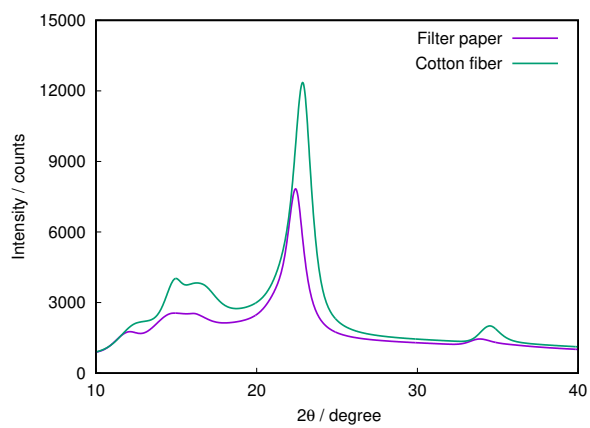

Figure S4: XRD scans of cellulose sources

### 2.3. Cellulose dissolution

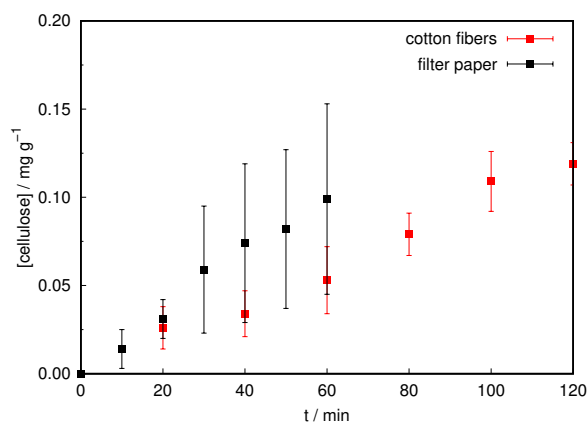

Figure S5: Rate of cellulose dissolution depending of the cellulose source

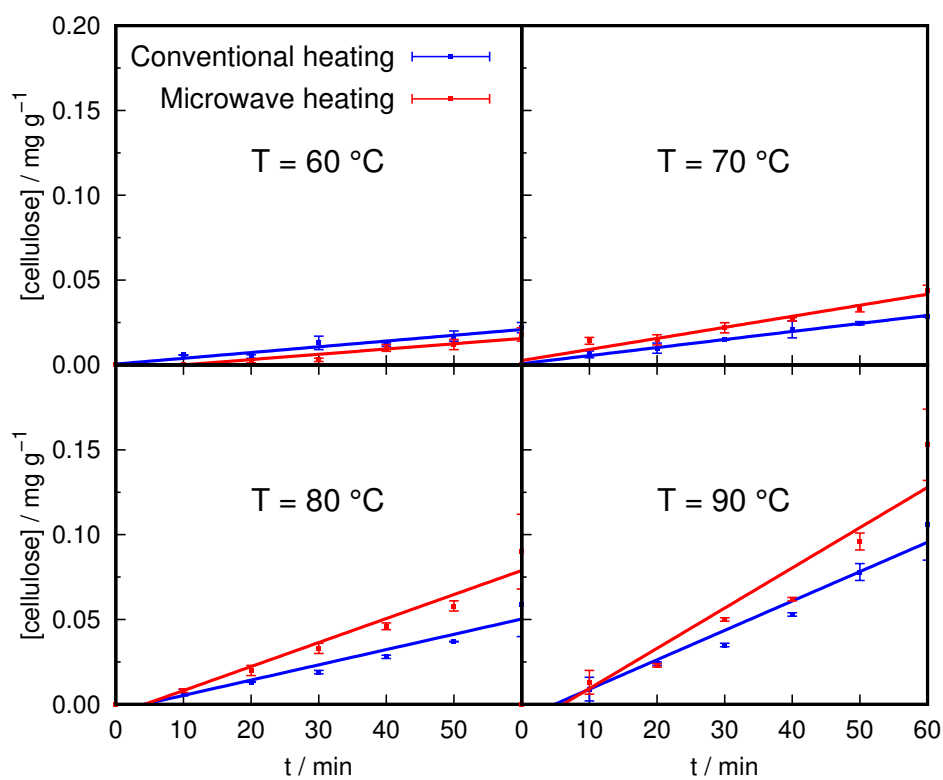

Figure S6: Linear fitting of dissolved cellulose fibers vs time for conventional and microwave heating modes at different temperatures: 60, 70, 80, 90 °C. Solvent is a mixture of  $[\text{C}_2\text{C}_1\text{Im}][\text{OAc}]$  and DMSO at 50% (w/w)

| T / °C | Dissolution rate / $\mu\text{g g}^{-1} \text{min}^{-1}$ |          | Regression coefficient |          |
|--------|---------------------------------------------------------|----------|------------------------|----------|
|        | $k_{hp}$                                                | $k_{mw}$ | $r_{hp}$               | $r_{mw}$ |
| 60     | 0.34                                                    | 0.31     | 0.97                   | 0.95     |
| 70     | 0.47                                                    | 0.65     | 0.99                   | 0.98     |
| 80     | 0.90                                                    | 1.41     | 0.97                   | 0.98     |
| 90     | 1.73                                                    | 2.37     | 0.98                   | 0.96     |

Table S1: Dissolution rate and regression coefficients of the linear fitting presented in Figure S6

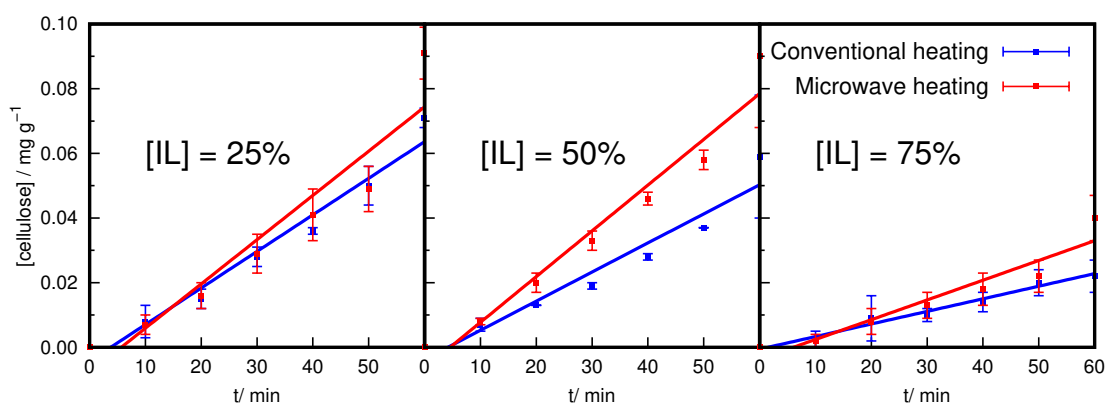

Figure S7: Linear fitting of dissolved cellulose fibers vs time for conventional and microwave heating modes at different concentrations of IL: 25, 50 and 75%. Temperature was set to 80°C in all cases.

| [IL] (w/w) | Dissolution rate / $\mu\text{g g}^{-1} \text{min}^{-1}$ |          | Regression coefficient |          |
|------------|---------------------------------------------------------|----------|------------------------|----------|
|            | $k_{hp}$                                                | $k_{mw}$ | $r_{hp}$               | $r_{mw}$ |
| 25         | 1.13                                                    | 1.37     | 0.98                   | 0.95     |
| 50         | 0.90                                                    | 1.41     | 0.97                   | 0.98     |
| 75         | 0.39                                                    | 0.61     | 0.99                   | 0.95     |

Table S2: Dissolution rate and regression coefficients of the linear fitting presented in Figure S7

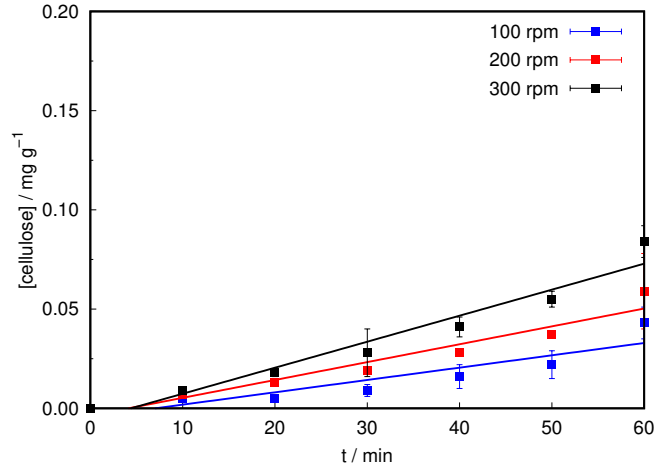

Figure S8: Linear fitting of dissolved cellulose fibers vs time for conventional at different stirring speeds: 100, 200 and 300 rpm. Concentration of IL is 50% and temperature was set to 80°C

| stirring speed /rpm | Dissolution rate / $\mu\text{g g}^{-1} \text{min}^{-1}$ | Regression coefficient |
|---------------------|---------------------------------------------------------|------------------------|
|                     | $k_{hp}$                                                | $r_{hp}$               |
| 100                 | 0.62                                                    | 0.92                   |
| 200                 | 0.90                                                    | 0.97                   |
| 300                 | 1.31                                                    | 0.97                   |

Table S3: Dissolution rate and regression coefficients of the linear fitting presented in Figure S8

#### 2.4. Evolution of viscosity and water content during dissolution

| [IL] (w/w) | before cellulose dissolution |       |       | after cellulose dissolution |       |       |
|------------|------------------------------|-------|-------|-----------------------------|-------|-------|
|            | A                            | B     | $T_0$ | A                           | B     | $T_0$ |
| 25         | 0.102                        | 550.4 | 152.5 | 0.109                       | 568.0 | 152.9 |
| 50         | 0.122                        | 604.2 | 165.0 | 0.123                       | 634.9 | 162.9 |
| 75         | 0.052                        | 961.0 | 150.0 | 0.090                       | 821.1 | 162.4 |

Table S4: Parameters of Vogel-Fulcher-Tamman fitting shown in figure 6

#### 2.5. Dielectric spectra

The contribution of conductivity in dielectric spectra in the Figure 7 of the manuscript was done according to the equation 1 where  $\epsilon''_{diel}$  accounts for dielectric loss,  $\sigma$  is the conductivity,  $\omega$  is frequency and  $\epsilon_0$  the absolute permittivity.

$$\text{Material loss} = \epsilon''_{diel} + \frac{\sigma}{\omega\epsilon_0} \quad (1)$$

Given than the second term of the addition accounts for the contribution of conductivity, we have proceeded as follows:

1. Material loss in the lower frequency range was fitted to  $1/\omega$ . Dielectric spectra given by the impedance analyser was used with this purpose.
2. According to equation 1, slope obtained in the previous step equals to  $\sigma / \epsilon_0$ .
3. Once  $\sigma$  is obtained, equation 1 can be used to disentangle dielectric and conductive contributions to material loss.

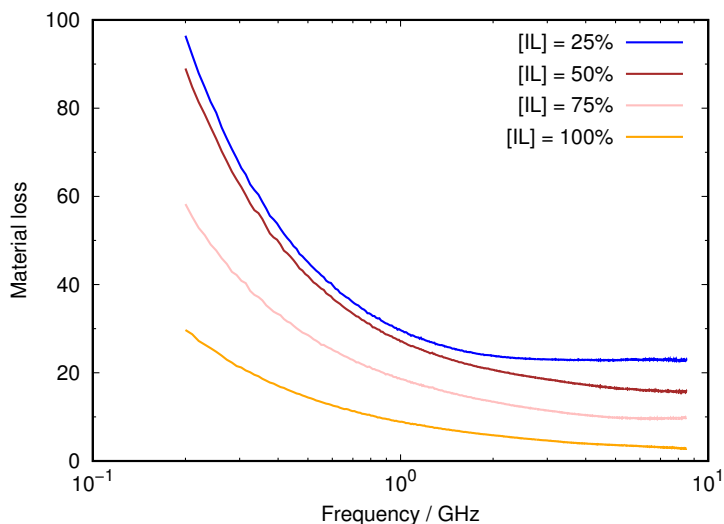

Figure S9: Dielectric spectra of  $[C_2C_1Im][OAc]$  + DMSO mixtures from 200 MHz and 8.5 GHz. Concentration range of  $[C_2C_1Im][OAc]$  between 25 to 100%

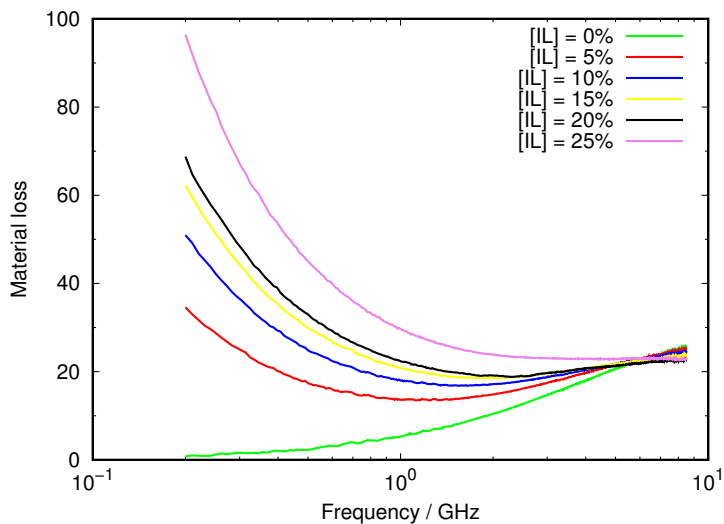

Figure S10: Dielectric spectra of  $[C_2C_1Im][OAc]$  + DMSO mixtures from 200 MHz and 8.5 GHz. Concentration range of  $[C_2C_1Im][OAc]$  between 0 to 25%

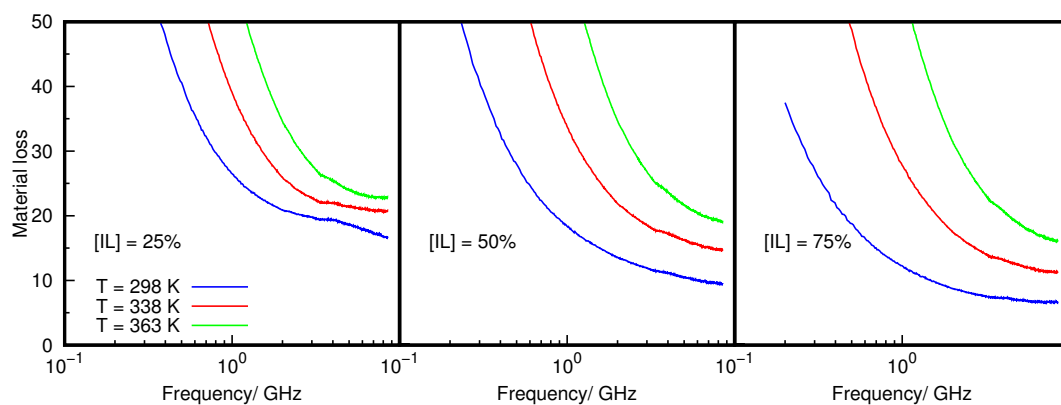

Figure S11: Dielectric spectra of  $[\text{C}_2\text{C}_1\text{Im}][\text{OAc}] + \text{DMSO}$  at three concentrations - 25, 50, 75% - and temperatures - 298, 338, 363 K.

## 2.6. Heating rate

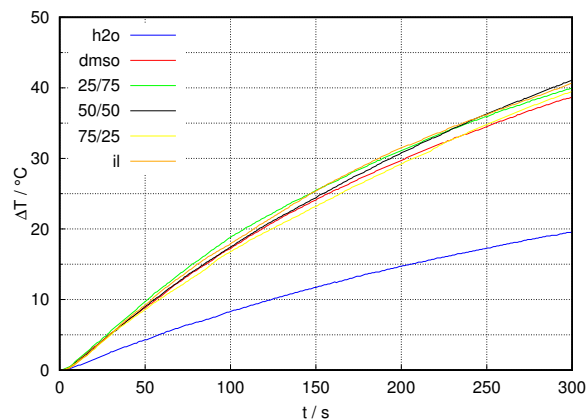

Figure S12: Heating rate of  $[\text{C}_2\text{C}_1\text{Im}][\text{OAc}] + \text{DMSO}$  mixtures at different concentrations,  $[\text{DMSO}] = 25\%$  (black),  $50\%$  (green) and  $75\%$  (red, respectively).
